# Supplementary material for: A lipophilic AIEgen for lipid droplet imaging and evaluation of the efficacy of HIF-1 targeting drugs
Source: Royal Society of Chemistry journal article supplement (doi:10.1039/c9tb02848j), 2020-01-01
Supplement: c9tb02848j1.pdf [file c9tb02848j1.pdf]

## Electronic Supplementary Information

### **A lipophilic AIEgen for lipid droplet imaging and evaluation of efficacy of HIF-1 targeting drugs†**

Xiujuan Shi,<sup>ab#</sup> Simon H. P. Sung,<sup>ab#</sup> Michelle M. S. Lee,<sup>b</sup> Ryan T. K. Kwok<sup>\*ab</sup>, Herman H. Y. Sung,<sup>b</sup> Haixiang Liu,<sup>ab</sup> Jacky W. Y. Lam,<sup>ab</sup> Ian D. Williams,<sup>b</sup> Bin Liu<sup>\*c</sup> and Ben Zhong Tang<sup>\*abde</sup>

a. HKUST Shenzhen Research Institute, No. 9 Yuexing 1st RD, South Area, Hi-tech Park, Nanshan, Shenzhen 518057, China

b. Department of Chemistry, Department of Chemical and Biological Engineering, Hong Kong Branch of Chinese National Engineering Research Center for Tissue Restoration and Reconstruction, and Institute for Advanced Study, The Hong Kong University of Science and Technology, Clear Water Bay, Kowloon, Hong Kong, China

c. Department of Chemical and Biomolecular Engineering, National University of Singapore, 117585, Singapore.

d. Ming Wai Lau Centre for Reparative Medicine, Karolinska Institutet, Hong Kong

e. NSFC Center for Luminescence from Molecular Aggregate, Guangdong Innovative Research Team, SCUT-HKUST Joint Research Laboratory, State Key Laboratory of Luminescent Materials and Devices, South China University of Technology, Guangzhou 510640, China

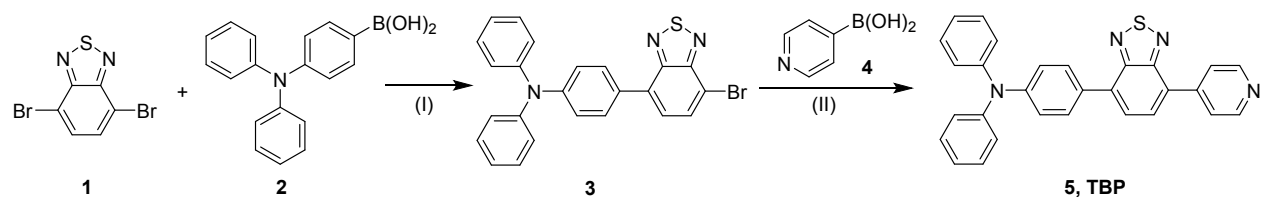

**Scheme S1.** The synthetic steps of TBP. (I and II)  $K_2CO_3$ ,  $Pd(PPh_3)_4$  and THF/ $H_2O$ .

### Synthesis of TBP

TBP was synthesized following the synthetic routes in the reported works.<sup>1,2</sup> The synthetic steps were listed in Scheme S1 and the procedures were described below.

**Synthesis of 3:** (4-(7-bromobenzo[*c*][1,2,5]thiadiazol-4-yl)-*N,N*-diphenylaniline): A mixture of **1** (3 g, 10 mmol), **2** (2.6 g, 9 mmol),  $Pd(PPh_3)_4$  (346 mg, 0.3 mmol) and  $K_2CO_3$  (13.8 g, 100 mmol) in THF (100 mL) and water (20 mL) was heated at 80°C under nitrogen atmosphere for 8 h. After cooling to room temperature, the mixture was extracted with DCM for 3 times and dried over anhydrous  $Na_2SO_4$ . The filtrate was concentrated under reduced pressure. The concentrate was purified by silica gel column chromatography with DCM and hexane (1:9, v/v) to afford the desired product as orange solid (2.07 g, 50 %).  $^1H$  NMR (400 MHz,  $CDCl_3$ ):  $\delta$  (TMS, ppm) 7.90-7.89 (1H, d), 7.82-7.79 (2H, d), 7.55-7.53 (1H, d), 7.32-7.28 (4H, m), 7.19-7.18 (6H, d), 7.09-7.06 (2H, t). Mass spectrum (MALDI-TOF),  $m/z$  calcd. for  $C_{24}H_{16}BrN_3S_3$ : 457.0248, found: 459.0185  $[M]^+$ .

**Synthesis of compound TBP** (*N,N*-diphenyl-4-(7-(pyridin-4-yl)benzo[*c*][1,2,5]thiadiazol-4-yl)aniline): A mixture of **3** (1 g, 2.18 mmol), **4** (536 mg, 4.36 mmol),  $Pd(PPh_3)_4$  (75 mg, 0.065 mmol) and  $K_2CO_3$  (3 g, 21.8 mmol) in THF (50 mL) and water (10 mL) was heated at 80°C under nitrogen atmosphere for 8 h. After cooling to room temperature, the mixture was extracted with DCM for 3 times and dried over anhydrous  $Na_2SO_4$ . The filtrate was concentrated under reduced pressure. The concentrate was purified by silica gel column chromatography with EA and DCM (1:99, v/v) to afford the desired product as red solid (776 mg, 78 %).  $^1H$  NMR (400 MHz,  $CDCl_3$ ):  $\delta$  (TMS, ppm) 8.78-8.76 (2H, q), 7.95-7.94 (2H, d), 7.94-7.87 (3H, d), 7.80-7.78 (1H, d), 7.32-7.28 (4H, t), 7.22-7.18 (6H, t), 7.10-7.06 (2H, t).  $^{13}C$  NMR (400 MHz,  $CDCl_3$ ):  $\delta$  (TMS, ppm) 154.07, 153.63, 150.20, 148.51, 147.34, 144.74, 134.71, 130.17, 130.08, 129.44, 129.29, 128.97, 126.90, 125.10, 123.56, 123.50, 122.57. Mass spectrum (MALDI-TOF),  $m/z$  calcd. for  $C_{29}H_{20}N_4S$ : 456.1409, found: 456.1402  $[M]^+$ .

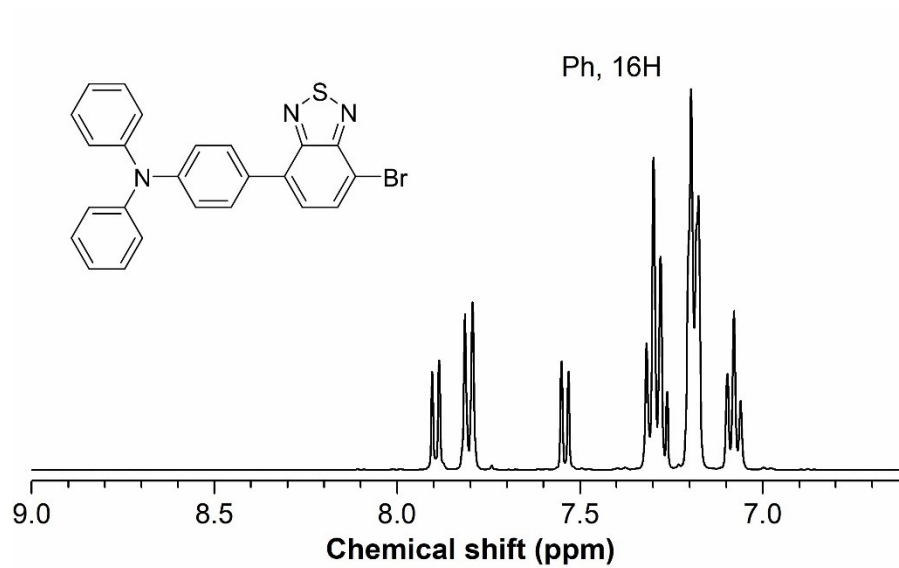

**Figure S1.**  $^1\text{H}$  NMR spectrum of **3** in  $\text{CDCl}_3$ .

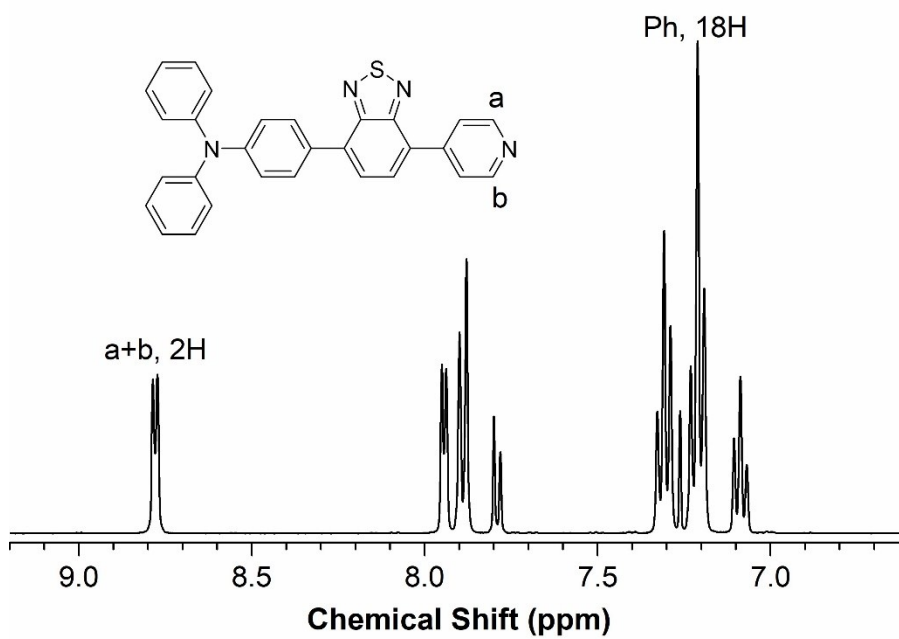

**Figure S2.**  $^1\text{H}$  NMR spectrum of **TBP** in  $\text{CDCl}_3$ .

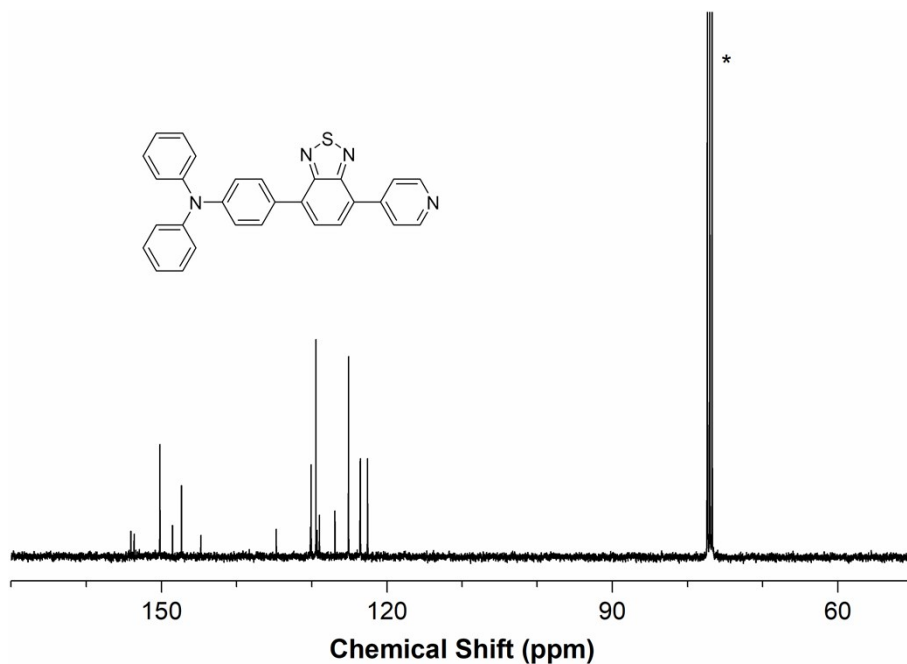

**Figure S3.**  $^{13}\text{C}$  NMR spectrum of TBP in  $\text{CDCl}_3$ .

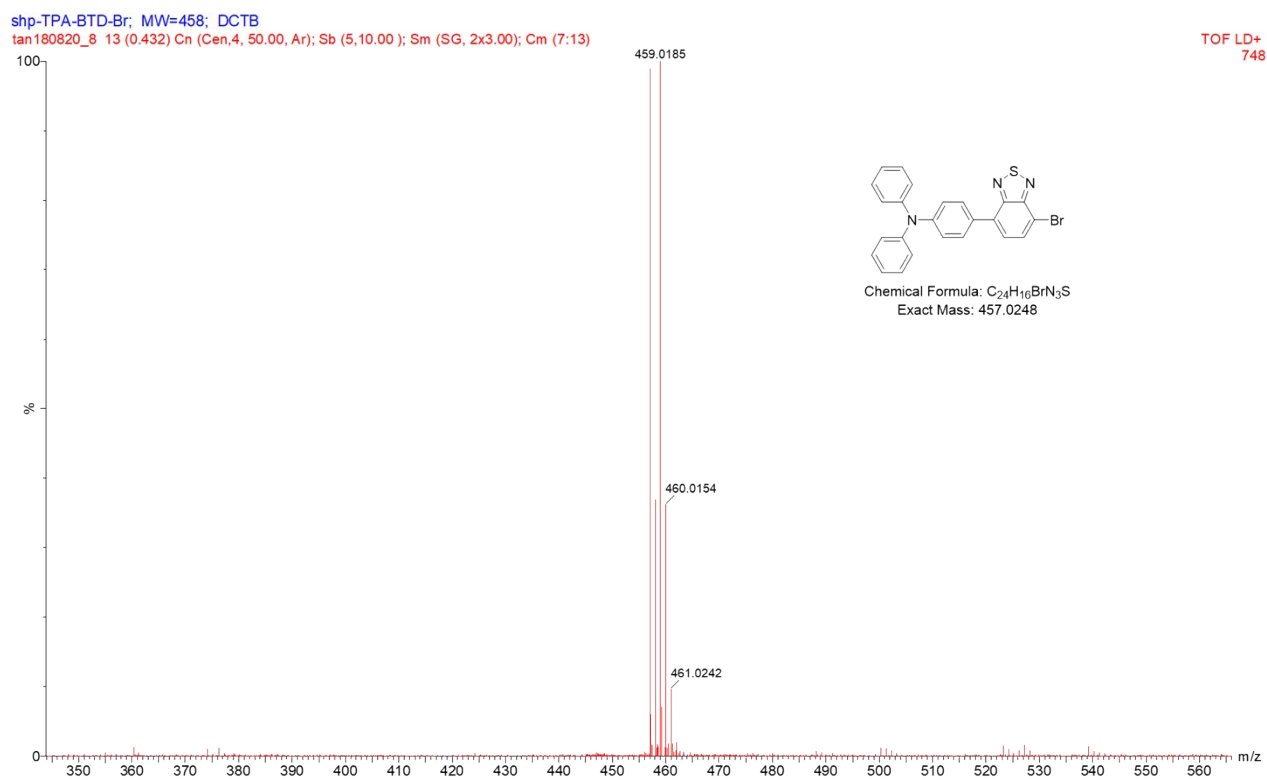

**Figure S4.** The high-resolution mass spectrum of **3**.

shp-TPA-BTD-PY; MW=456; DCTB

tan180524\_1 10 (0.334) Cn (Cen,4, 50.00, Ar); Sb (5,10.00); Sm (SG, 2x3.00); Cm (9:15)

TOF LD+  
941

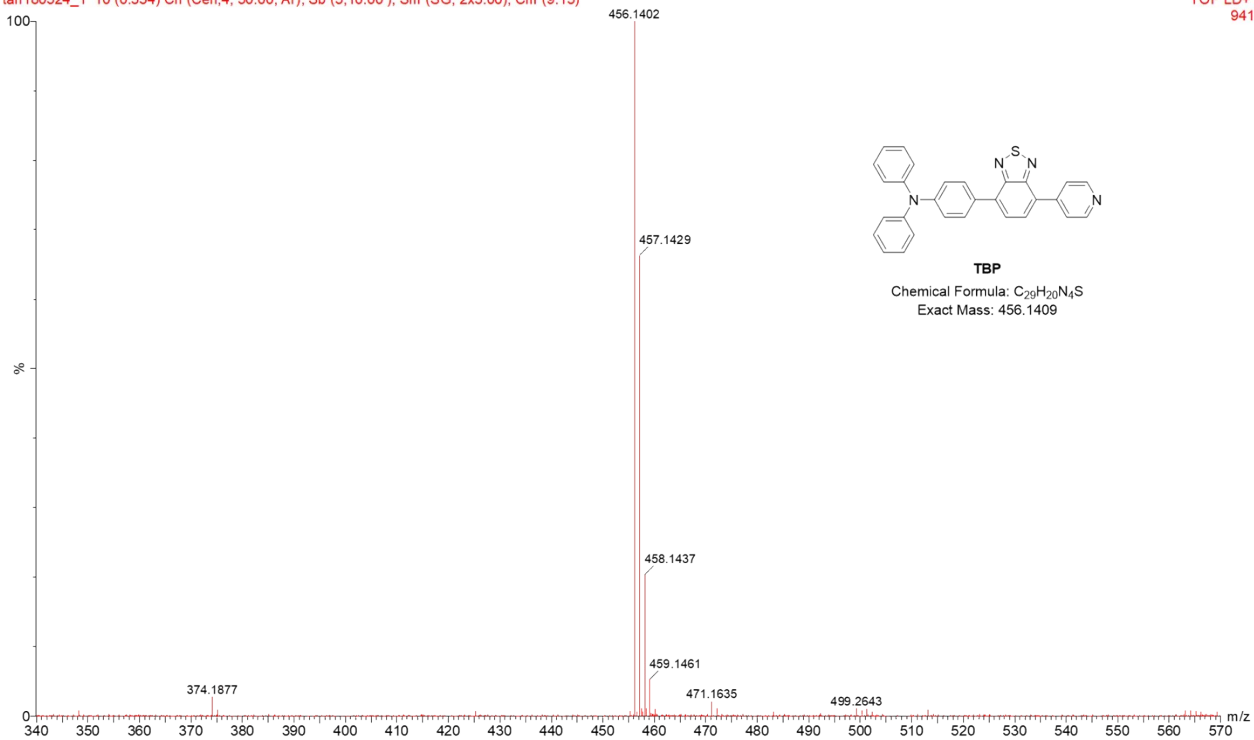

**Figure S5.** The high-resolution mass spectrum of TBP.

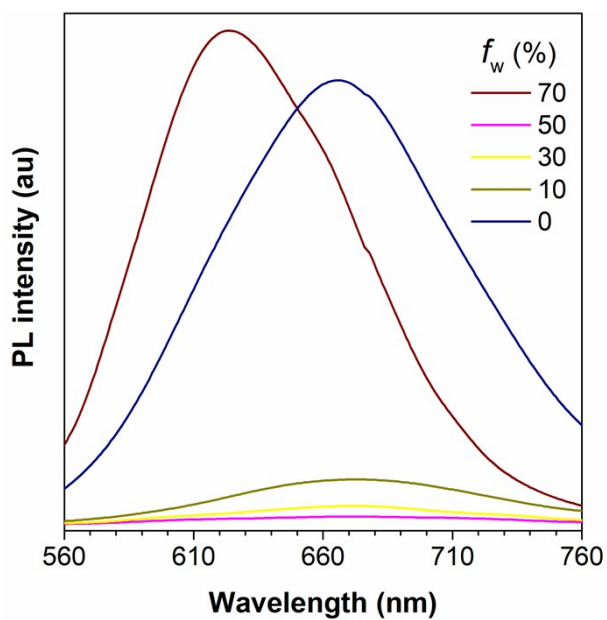

**Figure S6.** PL curves of TBP (10  $\mu$ M) in ACN/water mixtures with different water fractions ( $f_w$ ).

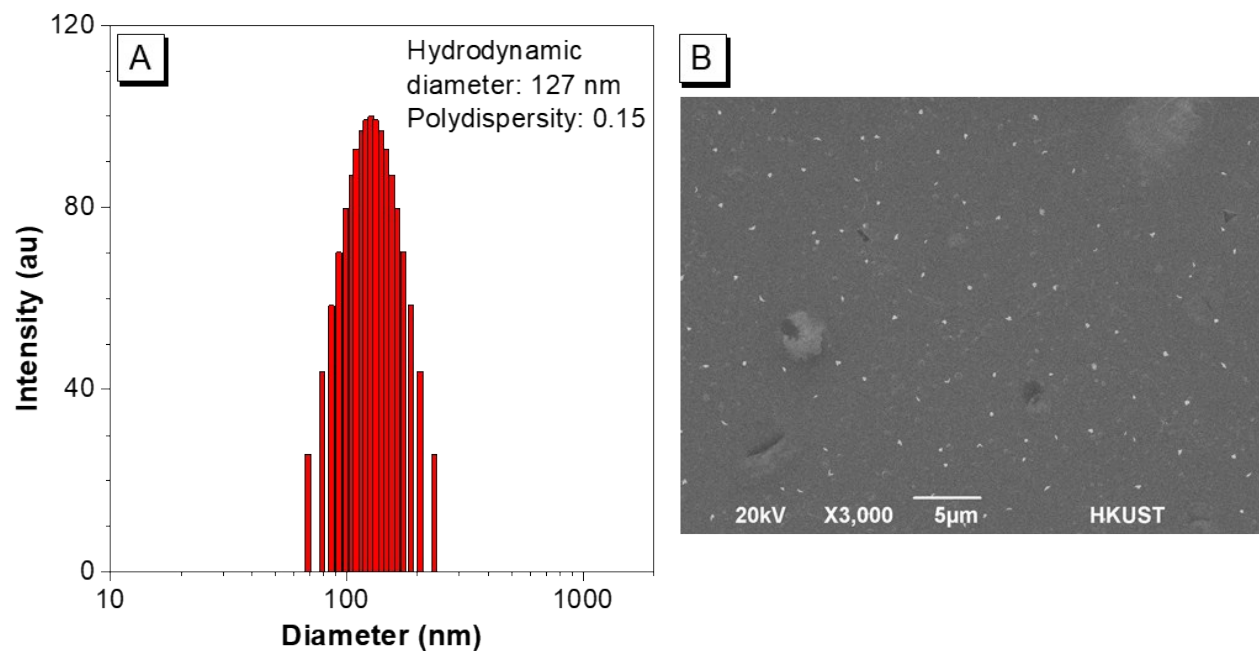

**Figure S7.** (A) Particle size distribution and (B) SEM image of TBP aggregates in the ACN/water mixture with a water fraction of 90%. SEM showed the aggregates with a diameter of about 120 nm.

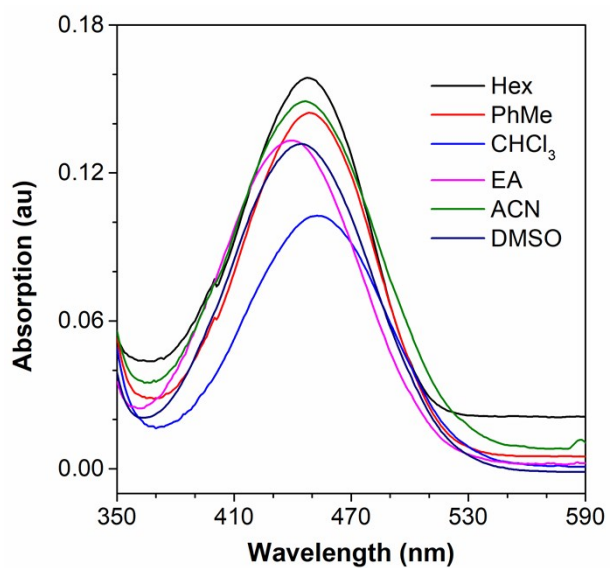

**Figure S8.** The UV-vis spectra of TBP in different solvents.

**Table S1.** Photophysical properties of TBP in different solvents.

| Solvents          | $E_T(30)$ <sup>a</sup> [kcal mol <sup>-1</sup> ] | $\lambda_{\text{abs}}$ [nm] | $\lambda_{\text{em}}$ [nm] | Stokes shift [nm] |
|-------------------|--------------------------------------------------|-----------------------------|----------------------------|-------------------|
| Hex               | 31                                               | 448                         | 526                        | 78                |
| PhMe              | 33.9                                             | 449                         | 570                        | 121               |
| CHCl <sub>3</sub> | 39.1                                             | 453                         | 615                        | 162               |
| EA                | 38.1                                             | 438                         | 614                        | 176               |
| ACN               | 45.6                                             | 446                         | 667                        | 221               |
| DMSO              | 45.1                                             | 444                         | 671                        | 227               |

a) The  $E_T(30)$  of each solvent was collected from reference.<sup>3</sup>

**Table S2.** Optical properties of TBP.

| AIEgen | $\lambda_{\text{abs}}$<br>[nm]<br>( $\epsilon \times 10^4 \text{ M}^{-1} \text{ cm}^{-1}$ ) <sup>a</sup> | $\lambda_{\text{em}}$ [nm]              |                                          |                                       | $\tau$<br>[ns] <sup>f</sup> | $k_r$<br>[ns <sup>-1</sup> ] <sup>f</sup> | $k_{nr}$<br>[ns <sup>-1</sup> ] <sup>f</sup> |
|--------|----------------------------------------------------------------------------------------------------------|-----------------------------------------|------------------------------------------|---------------------------------------|-----------------------------|-------------------------------------------|----------------------------------------------|
|        |                                                                                                          | Solution<br>( $\phi_F$ ) <sup>b,c</sup> | Aggregate<br>( $\phi_F$ ) <sup>c,d</sup> | Powder<br>( $\phi_F$ ) <sup>c,e</sup> |                             |                                           |                                              |
| TBP    | 444<br>(1.32)                                                                                            | 671<br>(3.5%)                           | 622<br>(30.2%)                           | 600<br>(24.7%)                        | 5.0                         | 0.05                                      | 0.15                                         |

a) Absorption peak and the molar extinction coefficient of TBP in DMSO solutions; b) Emission peak in DMSO; c) Fluorescence quantum yield determined by a calibrated integrating sphere; d) Emission maximum in 99% PBS (containing 1% DMSO); e) Emission peak of TBP powder; f) TBP powder measured under ambient conditions. Radiative decay rate calculated using  $k_r = \phi_F/\tau$ ; Non-radiative decay rate calculated using  $\phi_F = k_r / (k_r + k_{nr})$ .

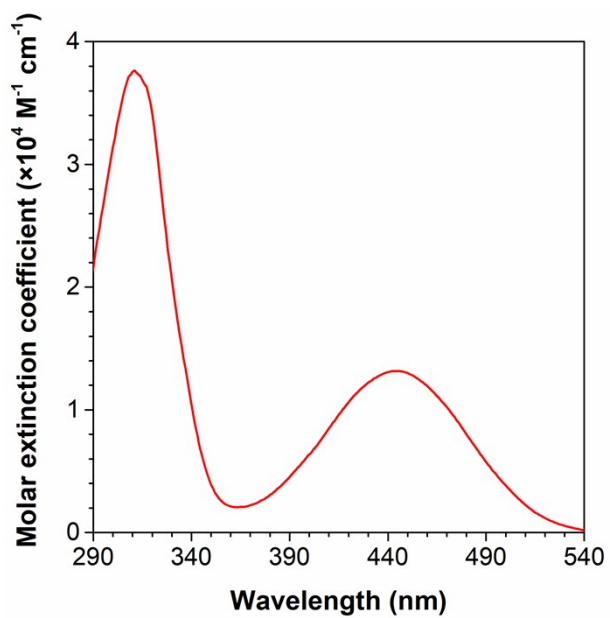

**Figure S9.** The absorption curve of TBP in DMSO.

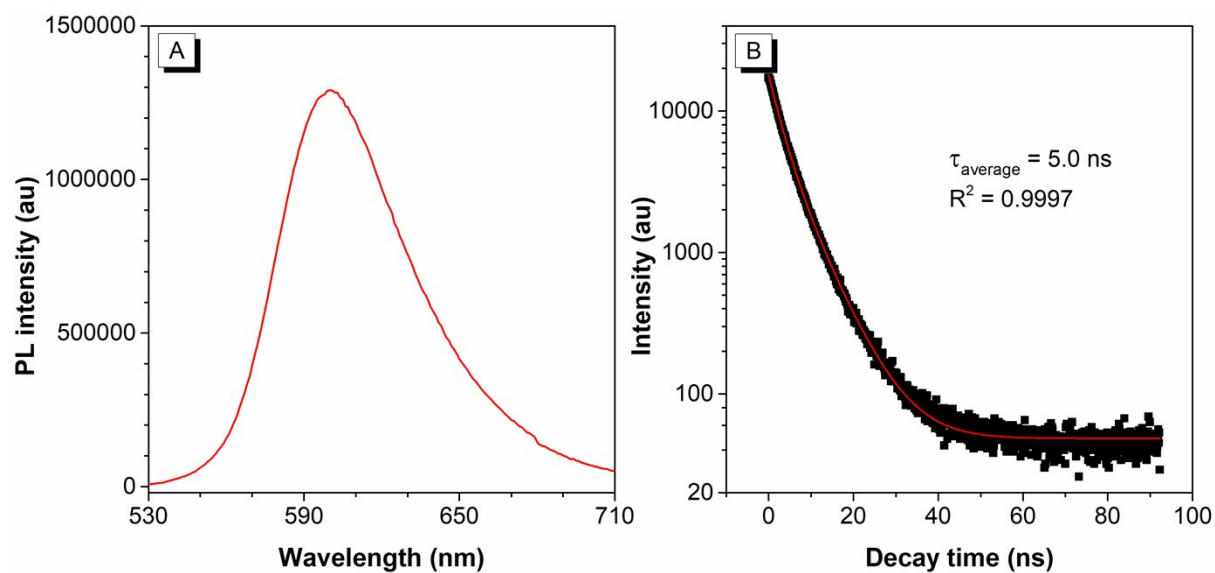

**Figure S10.** (A) The PL spectrum of TBP powder. (B) Fluorescence decay curve of TBP powder.



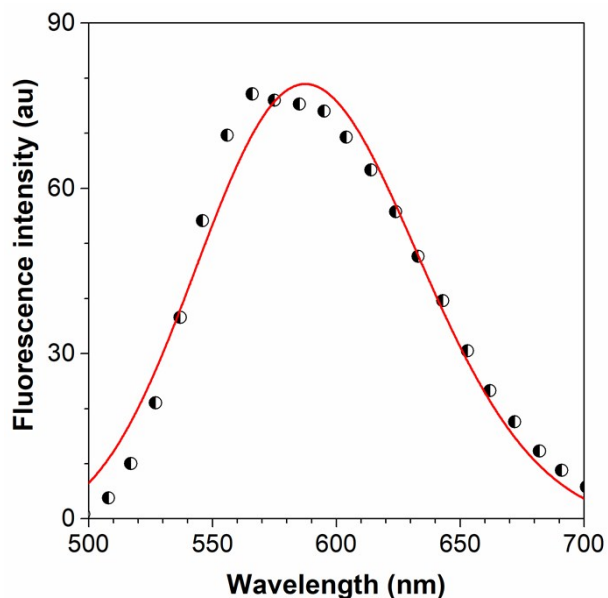

**Figure S11.** Fluorescence spectrum of HeLa cells stained with TBP.  $\lambda_{\text{ex}} = 488$  nm.

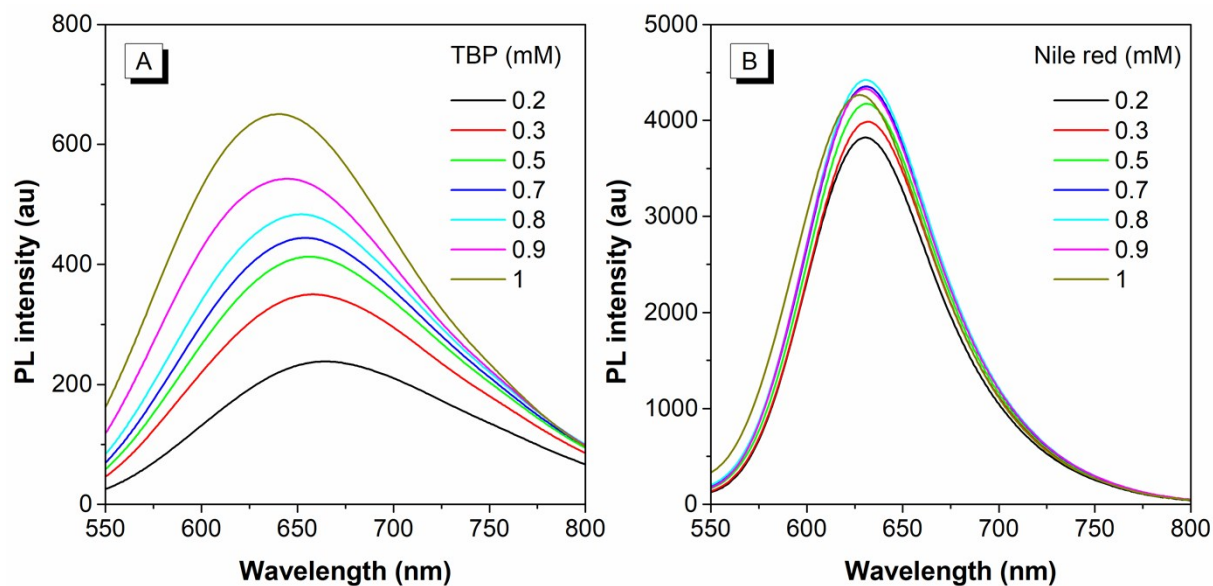

**Figure S12.** The fluorescence emission curves of (A) TBP or (B) Nile red with different concentrations in oleic acid solutions. Condition: for TBP,  $\lambda_{\text{ex}} = 430$  nm; for Nile red,  $\lambda_{\text{ex}} = 530$  nm.

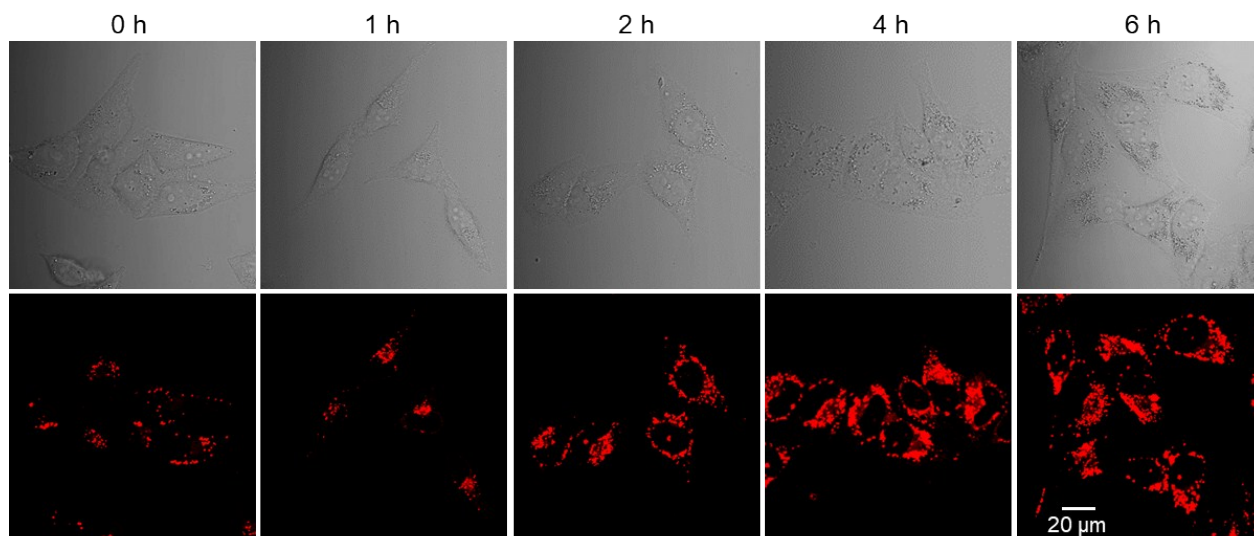

**Figure S13.** Confocal images of HeLa cells treated with 50 μM oleic acid for different times and then stained with 5 μM TBP for 30 min. Condition:  $\lambda_{\text{ex}} = 488 \text{ nm}$ ,  $\lambda_{\text{em}} = 550\text{--}740 \text{ nm}$ . Scale bar: 20 μm.

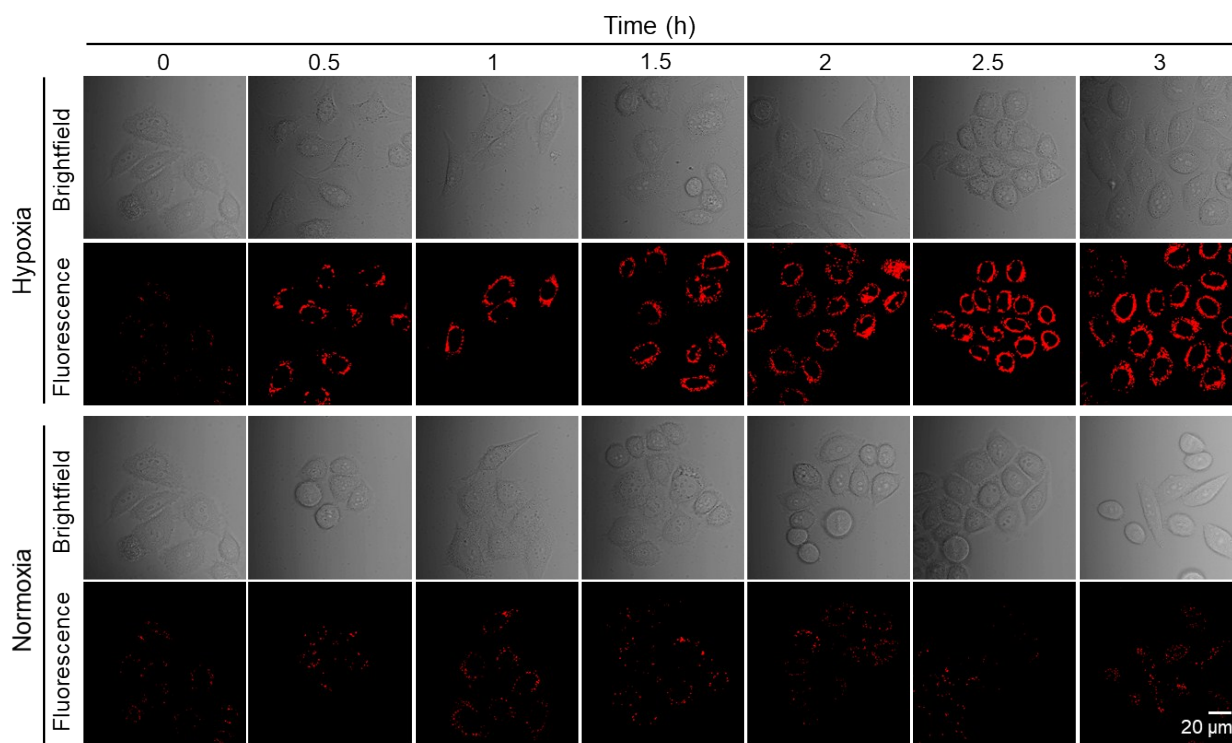

**Figure S14.** Confocal images of HepG2 cells under hypoxic or normoxic condition for different times, then incubated with 5 μM TBP for 30 min. Condition:  $\lambda_{\text{ex}} = 488 \text{ nm}$ ,  $\lambda_{\text{em}} = 550\text{--}740 \text{ nm}$ ; Scale bar: 20 μm.

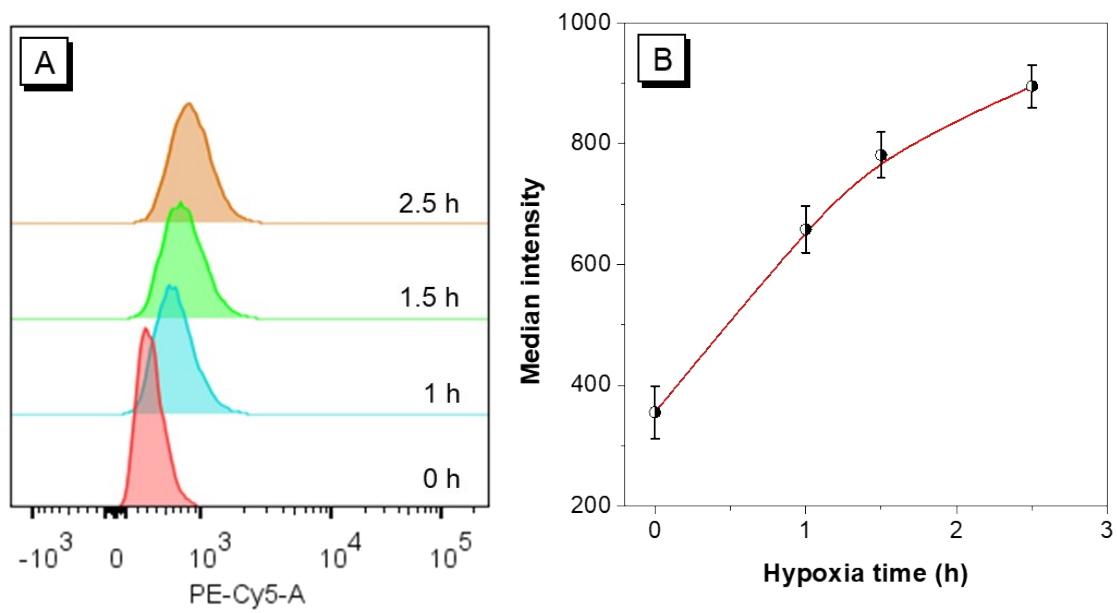

**Figure S15.** (A) The flow cytometry results of HepG2 cells in hypoxic environment for different times, then incubated with 5  $\mu\text{M}$  TBP for 30 min. (B) The median fluorescence intensity of HepG2 cells in hypoxic environment for different times acquired from the flow cytometry results in A. Condition,  $\lambda_{\text{ex}} = 488 \text{ nm}$ ,  $\lambda_{\text{em}} = 655 \pm 15 \text{ nm}$ .

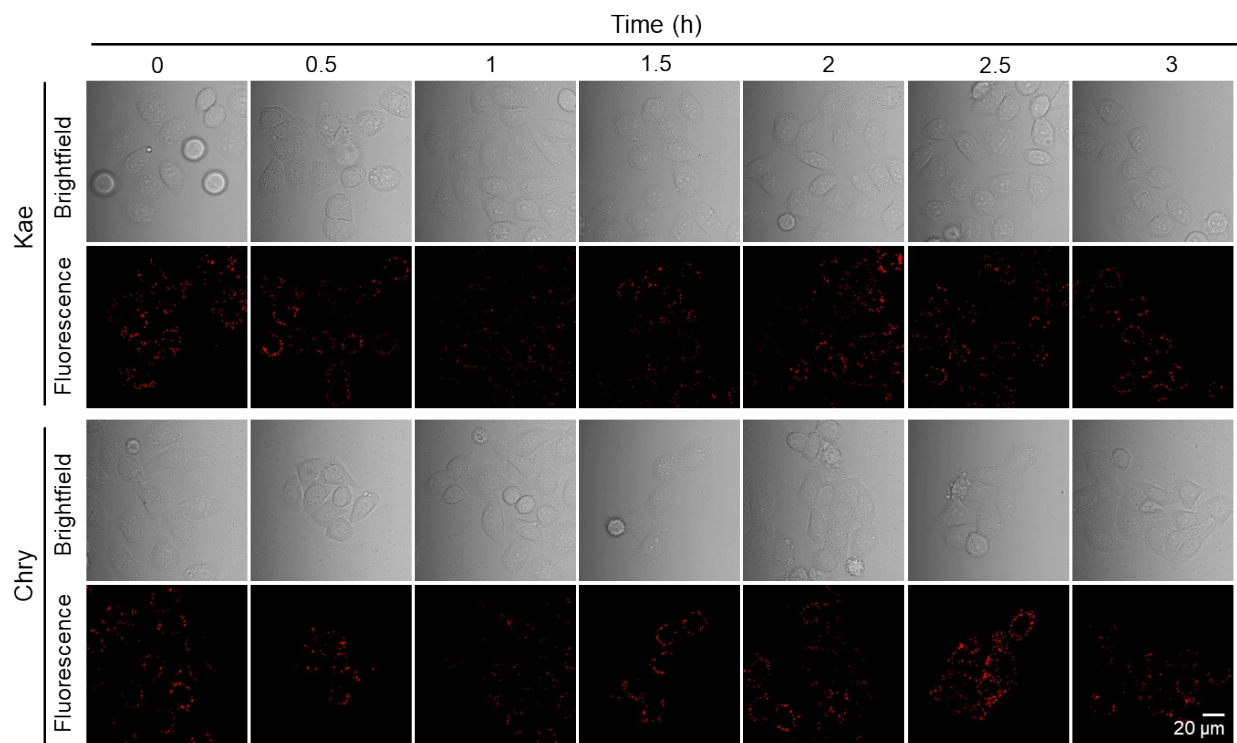

**Figure S16.** Confocal images of HepG2 cells pre-treated with 50  $\mu\text{M}$  Kae or Chry for 30 min followed by staying in hypoxia environment for different times, and then incubated with 5  $\mu\text{M}$  TBP for 30 min. Condition:  $\lambda_{\text{ex}} = 488 \text{ nm}$ ,  $\lambda_{\text{em}} = 550\text{--}740 \text{ nm}$ ; Scale bar: 20  $\mu\text{m}$ .

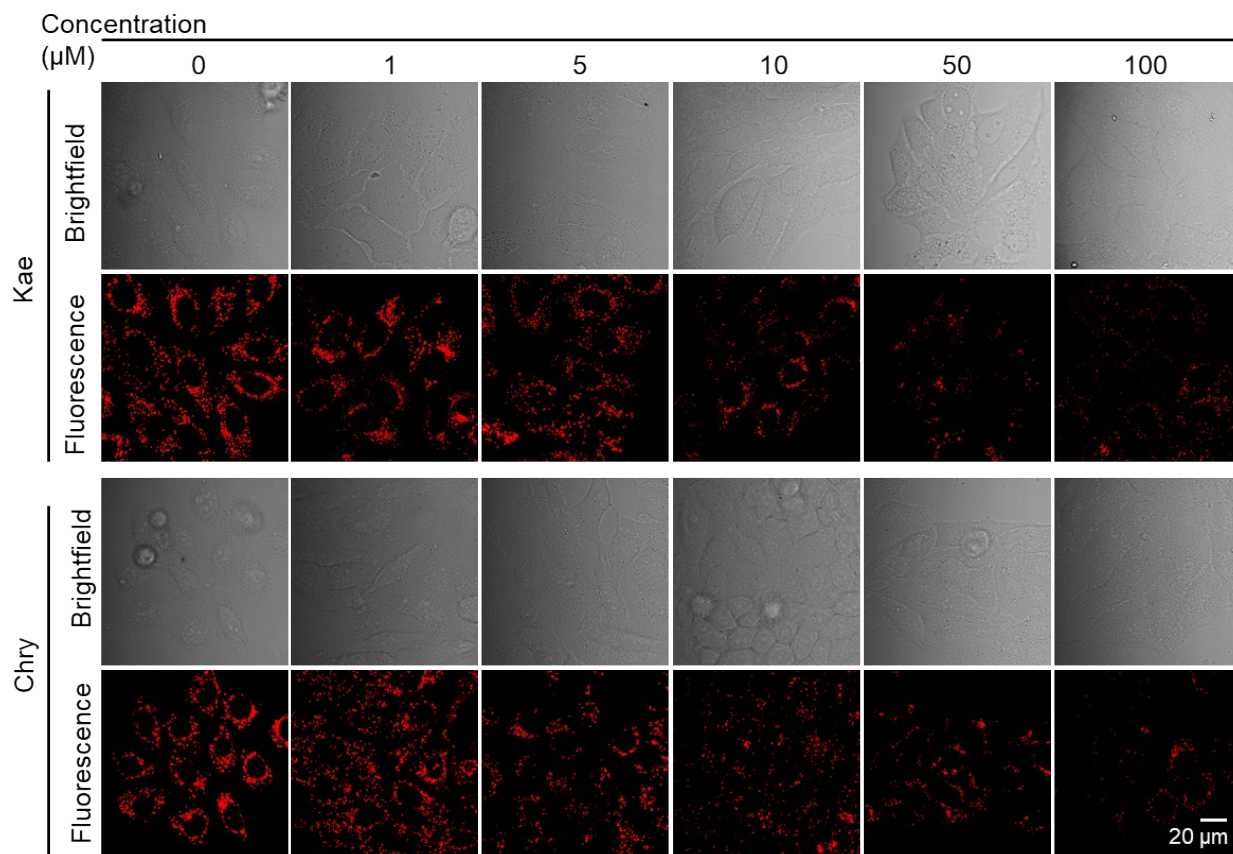

**Figure S17.** Confocal images of HepG2 cells pre-treated with different concentration of Kae or Chry for 30 min followed by staying in hypoxic environment for 3 h, then incubated with 5  $\mu\text{M}$  TBP for 30 min. Condition:  $\lambda_{\text{ex}} = 488 \text{ nm}$ ,  $\lambda_{\text{em}} = 550\text{--}740 \text{ nm}$ . Scale bar: 20  $\mu\text{m}$ .

**Table S2.** Crystal data and structure refinement for **TBP**.

---

|                                                                                                              |                                |                                   |                          |
|--------------------------------------------------------------------------------------------------------------|--------------------------------|-----------------------------------|--------------------------|
| Bond precision:                                                                                              | C-C = 0.0019 Å                 | Wavelength=1.54184                |                          |
| Cell:                                                                                                        | a=9.66643(15)<br>alpha=90      | b=9.81044(16)<br>beta=98.0470(16) | c=23.5812(4)<br>gamma=90 |
| Temperature:                                                                                                 | 100 K                          |                                   |                          |
|                                                                                                              | Calculated                     | Reported                          |                          |
| Volume                                                                                                       | 2214.23(6)                     | 2214.23(6)                        |                          |
| Space group                                                                                                  | P 21/n                         | P 1 21/n 1                        |                          |
| Hall group                                                                                                   | -P 2yn                         | -P 2yn                            |                          |
| Moiety formula                                                                                               | C29 H20 N4 S                   | C29 H20 N4 S                      |                          |
| Sum formula                                                                                                  | C29 H20 N4 S                   | C29 H20 N4 S                      |                          |
| Mr                                                                                                           | 456.55                         | 456.55                            |                          |
| Dx, g cm <sup>-3</sup>                                                                                       | 1.370                          | 1.370                             |                          |
| Z                                                                                                            | 4                              | 4                                 |                          |
| Mu (mm <sup>-1</sup> )                                                                                       | 1.496                          | 1.496                             |                          |
| F000                                                                                                         | 952.0                          | 952.0                             |                          |
| F000'                                                                                                        | 955.75                         |                                   |                          |
| h,k,l <sub>max</sub>                                                                                         | 11,11,28                       | 11,11,28                          |                          |
| N <sub>ref</sub>                                                                                             | 3992                           | 3980                              |                          |
| T <sub>min</sub> , T <sub>max</sub>                                                                          | 0.806, 0.956                   | 0.861, 1.000                      |                          |
| T <sub>min</sub> '                                                                                           | 0.799                          |                                   |                          |
| Correction method= # Reported T Limits: T <sub>min</sub> =0.861 T <sub>max</sub> =1.000 AbsCorr = MULTI-SCAN |                                |                                   |                          |
| Data completeness= 0.997                                                                                     | Theta(max)= 67.486             |                                   |                          |
| R(reflections)= 0.0303(3556)                                                                                 | wR2(reflections)= 0.0794(3980) |                                   |                          |
| S = 1.030                                                                                                    | Npar= 307                      |                                   |                          |
| CCDC                                                                                                         | 1945204                        |                                   |                          |

---

## References

1. J. Mao, D. Wang, S.-H. Liu, Y. Hang, Y. Xu, Q. Zhang, W. Wu, P.-T. Chou and J. Hua, *Asian J. Org. Chem.*, 2014, **3**, 153-160.
2. L. Wang, X. Yang, J. Zhao, F. Zhang, X. Wang and L. Sun, *ChemSusChem*, 2014, **7**, 2640-2646.
3. C. R., *Chem. Rev.*, 1994, **21**, 2319.
